# Supplementary material
Source: PubMed Central journal article supplement (PMC8017597)
Supplement: rcmb.2020-0121OC_tat_data_supplement.pdf [file rcmb.2020-0121OC_tat_data_supplement.pdf]

**FK506-binding Protein 13 Expression is Upregulated in Interstitial Lung Disease and  
Correlated with Clinical Severity: A Potentially Protective Role**

Victor Tat, Ehab A Ayaub, Anmar Ayoub, Megan Vierhout, Safaa Naiel, Manreet K Padwal,  
Soumeya Abed, Olivia Mekhael, Karun Tandon, Spencer D Reville, Tamana Yousof,  
Pierre-Simon Bellaye, Philipp S Kolb, Anna Dvorkin-Gheva, Asghar Naqvi,  
Jean-Claude Cutz, Nathan Hambly, Jiro Kato, Martha Vaughan, Joel Moss, Martin RJ Kolb  
and Kjetil Ask

ONLINE DATA SUPPLEMENT

## Online Data Supplement

### FIGURE LEGENDS

**Supplemental Figure 1.** Single-cell expression profile of FKBP13 expression in human IPF and control lung tissues. The open access single-cell RNAseq dataset by Reyfman et al. was used to assess FKBP13 RNA expression in distinct cellular populations. Data from 8 healthy controls and 4 IPF patients were included in the analysis. (A) Cells were assigned to clusters based on predefined canonical expression markers. (B) Feature plot demonstrating FKBP13 expression in various cell populations. (C) Violin plot demonstrating FKBP13 log<sub>2</sub> fold change mRNA expression in various cell populations from pooled IPF and control single-cell RNAseq data. \*,  $p < 0.05$  vs. healthy control.

**Supplemental Figure 2.** Pressure-volume loops for bleomycin-treated mice. (A,B) Pressure-driven pressure–volume (PV) loops was performed using flexiVent®. The average value of the animals in each group is shown. WT mice were unaffected with respect to lung function and histopathology, while FKBP13<sup>-/-</sup> mice displayed decreased static lung compliance. At the higher dose of bleomycin (0.06U), both WT and FKBP13<sup>-/-</sup> mice experienced a similar reduction in lung compliance at Day 21.

## Supplemental Figure 1

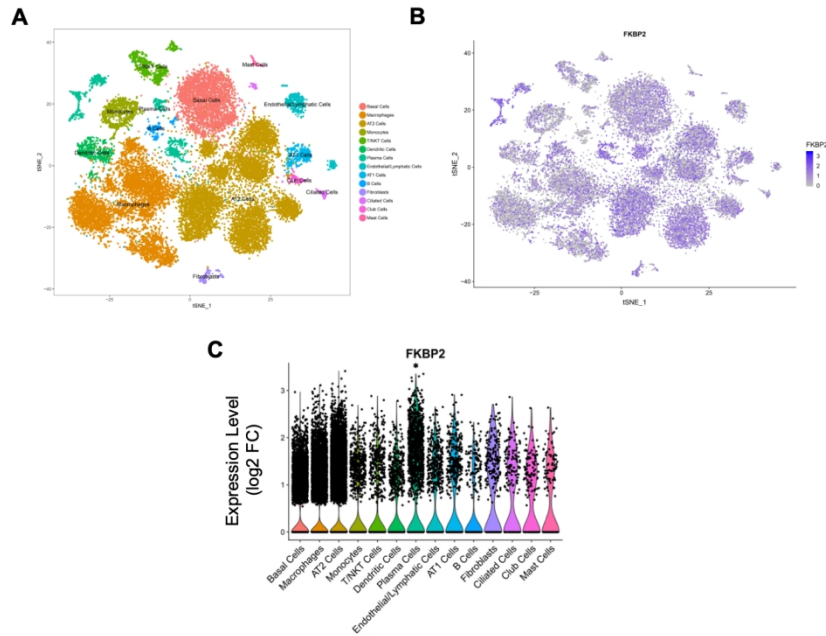

Supplemental Figure 1. Single-cell expression profile of FKBP13 expression in human IPF and control lung tissues. The open access single-cell RNAseq dataset by Reyfman et al. was used to assess FKBP13 RNA expression in distinct cellular populations. Data from 8 healthy controls and 4 IPF patients were included in the analysis. (A) Cells were assigned to clusters based on predefined canonical expression markers. (B) Feature plot demonstrating FKBP13 expression in various cell populations. (C) Violin plot demonstrating FKBP13 log<sub>2</sub> fold change mRNA expression in various cell populations from pooled IPF and control single-cell RNAseq data. \*,  $p < 0.05$  vs. healthy control.

## Supplemental Figure 2

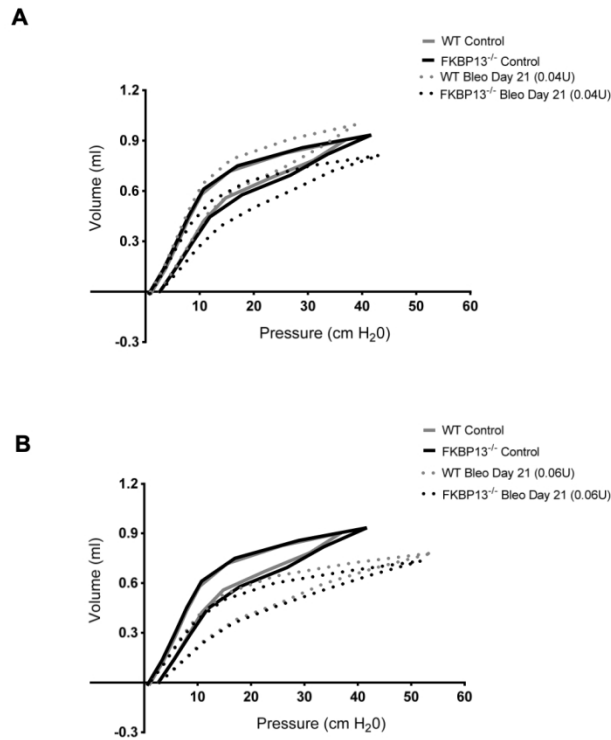

Supplemental Figure 2. Pressure-volume loops for bleomycin-treated mice. (A,B) Pressure-driven pressure-volume (PV) loops were performed using flexiVent®. The average value of the animals in each group is shown. WT mice were unaffected with respect to lung function and histopathology, while FKBP13<sup>-/-</sup> mice displayed decreased static lung compliance. At the higher dose of bleomycin (0.06U), both WT and FKBP13<sup>-/-</sup> mice experienced a similar reduction in lung compliance at Day 21.
